# Supplementary material for: Photochemical production of hydrogen peroxide from natural algicides: decomposition organic matter from straw
Source: Royal Society of Chemistry journal article supplement (doi:10.1039/c5em00224a), 2015-01-01
Supplement: c5em00224a1.pdf [file c5em00224a1.pdf]

## Supplementary Information

### Photochemical production of hydrogen peroxide from the natural algicide: decomposition organic matters from straw

Hua Ma,<sup>\*ab</sup> Jie Zhang,<sup>a</sup> Liyin Tong,<sup>a</sup> Jixiang Yang<sup>b</sup>

<sup>a</sup>Key Laboratory of Three Gorges Reservoir Region's Eco-Environment, Ministry of Education, Chongqing  
University, Chongqing, 400045, P. R. China

<sup>b</sup>National Center for International Research of Low-carbon and Green Buildings, Chongqing University,  
Chongqing, 400045, P. R. China

<sup>c</sup>Chongqing Institute of Green and Intelligent Technology, Chinese Academy of Sciences, Chongqing, 400  
714, P. R. China

\*Corresponding author

E-mail: hua.ma.sky@hotmail.com; water\_mh@126.com

Phone: (86) 23 65126160

Fax: (86) 23 65126160

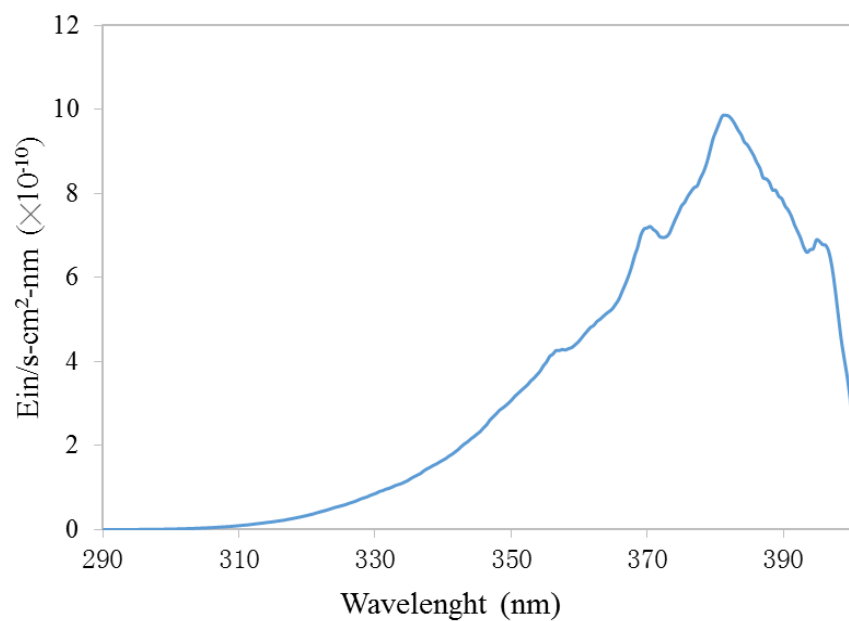

**Figure S1.** Photon irradiance as a function of wavelength for xenon lamp with light filter (>400nm cutoff) measured by Maya 2000pro spectrometer (Ocean Optic).

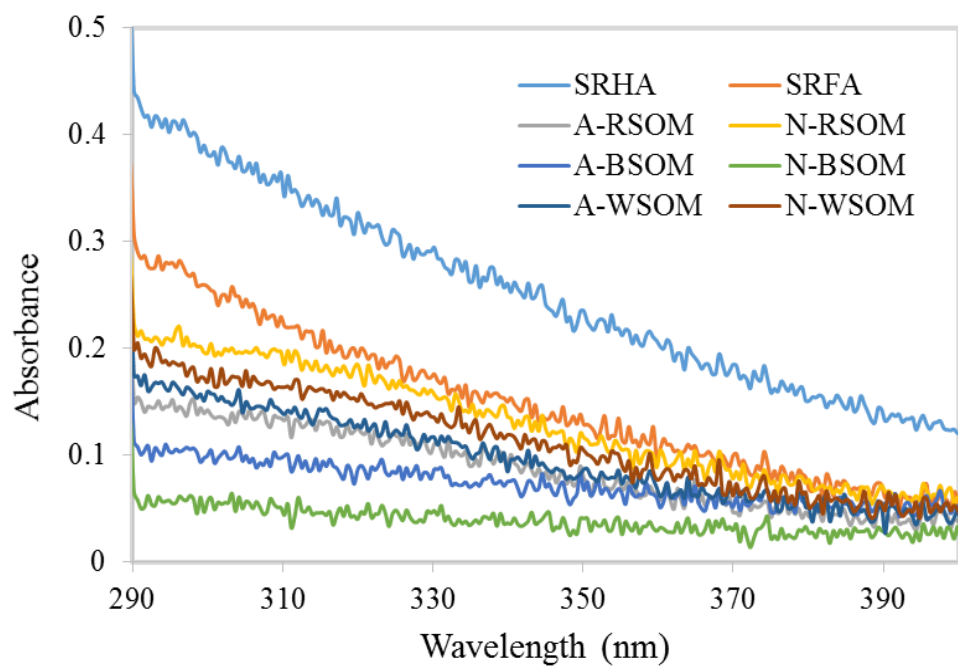

**Figure S2.** UV-vis absorbance spectrums (240-400 nm) of NOM isolates (SRHA, SRFA) and straw decomposition organic matter (A-RSOM, N-RSOM, A-BSOM, N-BSOM, A-WSOM, N-WSOM) solutions in 1cm quartz cell.

**Table S1.** The results of Boehm titration (mmol/g)

| Samples | basic | phenolic | lactonic | carboxylic | pH   |
|---------|-------|----------|----------|------------|------|
| SRHA    | -     | 0.30     | 0.19     | 0.29       | 6.85 |
| SRFA    | -     | 0.51     | 0.21     | 0.41       | 6.88 |
| A-RSOM  | -     | 0.39     | 0.25     | 0.25       | 6.87 |
| N-RSOM  | -     | 0.29     | 0.17     | 0.22       | 6.90 |
| A-BSOM  | 1.00  | 0.91     | 0.19     | 0.44       | 7.03 |
| N-BSOM  | 1.10  | 0.60     | 0.11     | 0.38       | 7.11 |
| A-WSOM  | 0.09  | 0.42     | 0.18     | 0.21       | 7.10 |
| N-WSOM  | 0.09  | 0.30     | 0.15     | 0.19       | 7.09 |

"-": not calculated because values were below detection limit.
